# Supplementary material for: Sequential induction of three recombination directionality factors directs assembly of tripartite integrative and conjugative elements
Source: PubMed Central journal article supplement (PMC5882170; doi:10.1371/journal.pgen.1007292), 2018-03-22
Supplement: pgen.1007292.s007.pdf [file pgen.1007292.s007.pdf]

| #                               | Primer                  | <sup>a</sup> Sequence                                                 | Source     |
|---------------------------------|-------------------------|-----------------------------------------------------------------------|------------|
| <b>Cloning primers</b>          |                         |                                                                       |            |
| 1                               | <i>ΩrdfG_Up_5'_SacI</i> | ATCAG <b>GAGCTC</b> AAGCAGCGTGACAAGCGGC                               | This study |
| 2                               | <i>ΩrdfG_Up_3'_XhoI</i> | ATCAG <b>CTCGAG</b> GTCAAATGGGATCGAGGATGACGG                          | This study |
| 3                               | <i>ΩrdfG_Dn_5'_XbaI</i> | ATCAG <b>TCTAG</b> AAATCCGTCGCGCCTCAATGT                              | This study |
| 4                               | <i>ΩrdfG_Dn_3'_NotI</i> | ATCAG <b>GCGGCC</b> CGCTTGCCCCGGCTGGGCCTT                             | This study |
| 5                               | <i>ΩrdfM_Up_5'_SacI</i> | ATCAG <b>GAGCTC</b> CCACGCAAGCGCAGCG                                  | This study |
| 6                               | <i>ΩrdfM_Up_3'_XhoI</i> | ATCAG <b>CTCGAG</b> ACGCTTGTTGCGTATACGCTGTAGAC                        | This study |
| 7                               | <i>ΩrdfM_Dn_5'_XbaI</i> | ATCAG <b>TCTAG</b> AGGACGCTGCCTCGGTCTCT                               | This study |
| 8                               | <i>ΩrdfM_Dn_3'_NotI</i> | ATCAG <b>GCGGCC</b> CGGTACCTGTCAACGATCGGCAAG                          | This study |
| 9                               | <i>ΔrdfS_Up_5'_gib</i>  | <b>ACTAAAGGGAACAAAAGCTGGAGCTCGGCATCGTACCCCGGTGC</b>                   | This study |
| 10                              | <i>ΔrdfS_Up_3'_gib</i>  | <b>TGGGTGTGGTTCTCCTTTTTGGCGCGGGCGG</b>                                | This study |
| 11                              | <i>ΔrdfS_Dn_5'_gib</i>  | <b>CGCGCCAAAAAGG</b> AGAACCACACCCATTCCAACGATG                         | This study |
| 12                              | <i>ΔrdfS_Dn_3'_gib</i>  | <b>TTGGGTACCGGGCCCCCCTCGAGG</b> TAGCGCTCGGGTCCGGCG                    | This study |
| 13                              | <i>rdfG_5'_HindIII</i>  | ATCAG <b>AAGCTT</b> GTTGCGCGTCCGCTCAATC                               | This study |
| 14                              | <i>rdfG_3'_XbaI</i>     | ATCAG <b>TCTAG</b> ATCATCCTCGATCCCATTTGACG                            | This study |
| 15                              | <i>rdfM_5'_HindIII</i>  | ATCAG <b>AAGCTT</b> AGCAAGCCTATTCTGGTGCCG                             | This study |
| 16                              | <i>rdfM_3'_XbaI</i>     | ATCAG <b>TCTAG</b> ATTATCGTTTTTCAACGTCCCGTTTGCT                       | This study |
| 17                              | <i>rdfS_5'_HindIII</i>  | ATCAG <b>AAGCTT</b> GCCGAGGAGCGGCGAAA                                 | This study |
| 18                              | <i>rdfS_3'_XbaI</i>     | ATCAG <b>TCTAG</b> ATCATGAGCGGCCTCCATCGT                              | This study |
| 19                              | <i>rdfG_5'_BamHI</i>    | ATGAC <b>GGATCC</b> ACATTGAGGCGCGACGGATT                              | This study |
| 20                              | <i>rdfG_3'_KpnI</i>     | ATGAC <b>GGTACCT</b> CATCCTCGATCCCATTTGACG                            | This study |
| 21                              | <i>traI1_5'_KpnI</i>    | ATCTAG <b>GTACC</b> <u>GGAGGCGACGA</u> ATGATGCAGCTAATCACACCTGAGC      | This study |
| 22                              | <i>traI1_3'_KpnI</i>    | ATCTAG <b>GTACC</b> TTAAGCGTATGCCGGCAGGC                              | This study |
| 23                              | <i>rdfM_5'_SacI</i>     | ATCAG <b>GAGCTC</b> <u>GGAGGCGACGA</u> ATGAAGAGTGACGCAATCTCGTATGCC    | This study |
| 24                              | <i>traR_5'_PstI</i>     | ATCTA <b>CTGCA</b> <u>GGAGGCGACGA</u> ATGCATCGCGTGTGGAAAATTTCC        | This study |
| 25                              | <i>traR_3'_XbaI</i>     | ATCTA <b>TCTAG</b> ATCAGGATCTCGAATGTCCGGAA                            | This study |
| 26                              | <i>msi172_5'_gib</i>    | <b>TAACAATTTACACATAGCTAACTG</b> <u>GGAGGCGACGA</u> ATGCCTGCAGTTCTCGTG | This study |
| 27                              | <i>msi171_3'_gib</i>    | <b>CTTTAGATGCCGCTTCTTTTGCAG</b> ATCAAAGAAGGAAATCCCTGTACCC             | This study |
| 28                              | <i>PrdfG_5'_XhoI</i>    | ATGAC <b>CTCGAG</b> TGCTCGTGAGCAAGACCTAGGCTT                          | This study |
| 29                              | <i>PrdfG_3'_XhoI</i>    | ATGAC <b>CTCGA</b> AATCCGTCGCGCCTCAATGT                               | This study |
| 30                              | <i>PrdfM_5'_XhoI</i>    | ATGAC <b>CTCGAG</b> TGGGTCGTTGATCGCCAGC                               | This study |
| 31                              | <i>PrdfM_3'_XhoI</i>    | ATGAC <b>CTCGA</b> GGACGCTGCCTCGGTCTCT                                | This study |
| 32                              | <i>PrdfS_5'_XhoI</i>    | ATGAC <b>CTCGA</b> TCCGGCCGACCCGAG                                    | This study |
| 33                              | <i>PrdfS_3'_XhoI</i>    | ATGAC <b>CTCGA</b> GATGATCCTCGTTTGGCTTGCG                             | This study |
| 34                              | <i>aadA1_5'_Blunt</i>   | <b>ATGCATGTCGAC</b> GGAGCTGCATGTGTGACAGGT                             | This study |
| 35                              | <i>aadA1_3'_Blunt</i>   | <b>GAGCTCGGTACC</b> GAGGCCCTTTTCGTTCAAGA                              | This study |
| 36                              | <i>traR2_5'_SpeI</i>    | ATCAG <b>ACTAGT</b> <u>GGAGGCGACGA</u> ATGACGAGGGACATGCCACTTGT        | This study |
| 37                              | <i>traR2_3'_XbaI</i>    | ATCAG <b>TCTAG</b> ATCAGAGGATCGAGCTCCCTTGG                            | This study |
| 38                              | <i>PtraI1_5'_BglII</i>  | ATCTA <b>AGATCT</b> CGACATTCGAGATCCTGATTCCTT                          | This study |
| 39                              | <i>PtraI1_3'_XhoI</i>   | ATCTA <b>CTCGA</b> TTGTGCGCTCCGTGCAGG                                 | This study |
| <b><sup>b</sup>QPCR primers</b> |                         |                                                                       |            |
| 40                              | 1271attB(G)F            | GCATCAACCGCGTCGTCTA                                                   | [19]       |

| #  | Primer                    | <sup>a</sup> Sequence   | Source |
|----|---------------------------|-------------------------|--------|
| 41 | 1271attB(G)R              | GAAGTCTCCGGCAGCGAAA     | [19]   |
| 42 | 1271attB(M)F              | GCTCCAGGTGTGCGTTTCT     | [19]   |
| 43 | 1271attB(M)R              | TGGGTTGATTTGGGCGATCT    | [19]   |
| 44 | 1271attB(S)F              | TGTCTTTGGGCTTAGCGTTCT   | [19]   |
| 45 | 1271attB(S)R              | ACAGGCCCAGATAGCTCAGTT   | [19]   |
| 46 | ICE <i>McSym</i> 1271(G)F | CAGTCTGCAGCAACGATGAC    | [19]   |
| 47 | ICE <i>McSym</i> 1271(G)R | CAGTGTGTTGAAATTCCGGTTGA | [19]   |
| 48 | ICE <i>McSym</i> 1271(M)F | GACCGTGGTCTTTGCTTTGG    | [19]   |
| 49 | ICE <i>McSym</i> 1271(M)R | TCTCCGAACGTCCGCAA       | [19]   |
| 50 | ICE <i>McSym</i> 1271(S)F | GGAACCGAACCAATCCACAGA   | [19]   |
| 51 | ICE <i>McSym</i> 1271(S)R | TGCCGAAACAGAAGCGTAGA    | [19]   |
| 52 | 1271 <i>melR</i> F        | CTGATGTCACCAAGTGTGCG    | [19]   |
| 53 | 1271 <i>melR</i> R        | CGCCAGGTCGAGGTTAATT     | [19]   |

<sup>a</sup> Text in bold demarks a restriction site (detailed in the primer name), or overlapping region for Gibson cloning. Underlined text demarks an artificially introduced RBS.

<sup>b</sup> QPCR primer targets sites are as follows; *attB<sub>G</sub>* 44 & 45; *attB<sub>M</sub>* 46 & 47; *attB<sub>S</sub>* 48 & 49; *attP<sub>G</sub>* 50 & 51; *attP<sub>M</sub>* 52 & 53; *attP<sub>S</sub>* 54 & 55; *melR* 56 & 57.
